# Supplementary material for: Comorbidities of COPD
Source: PubMed Central journal article supplement — Eur Respir Rev. 2013 Dec;22(130):454–75. doi: 10.1183/09059180.00008612 (PMC9639181; doi:10.1183/09059180.00008612), 2013-12
Supplement: ERR_0086-2012_Disclosure.pdf [file ERR_0086-2012_Disclosure.pdf]

**J.C. Meurice** has received fees for participating at congresses and in expert groups from ResMed, Philips, Novartis and Orkyn. He has been responsible of a scientific committee of a clinical study whose promotion was run by ResMed. He has received funding for attending a symposium, speaking, consulting and research.

DOI: 10.1183/09059180.00008612
